# Supplementary material
Source: Elsevier journal article supplement (https://www.sciencedirect.com/science/article/pii/S0034935619300805)
Supplement: mmc1 [file S0034935619300805:mmc1.docx]

Material adicional online.

Tabla 2. Referencias bibliográficas sobre enfermedad de Forestier y Rotés-Querol relacionadas con cirugía y/o anestesia (hasta febrero 2019).

| Cammisa M, De Serio A, Guglielmi G. Diffuse idiopathic skeletal hyperostosis. Eur J Radiol 1998; 27 (Suppl 1): S7-11.  Resnick D, Niwayama G. Radiographic and pathologic features of spinal involvement in diffuse idiopathic skeletal hyperostosis (DISH). Radiology 1976; 119 (3): 559-568.  Kiss C, O’Neill TW, Mituszova M, Szilagyi M, Poor G. The prevalence of diffuse idiopathic skeletal hyperostosis in a population-based study in Hungary. Scand J Rheumatol 2002; 31 (4): 226-229.  Sarzi-Puttini P, Atzeni F. New developments in our understanding of DISH (diffuse idiopathic skeletal hyperostosis). Curr Opin Rheumatol 2004; 16 (3): 287-292.  Naik B, Lobato EB, Sulek CA. Dysphagia, obstructive sleep apnea, and difficult intubation secondary to diffuse idiopathic skeletal hyperostosis. Anesthesiology 2004; 100 (5): 1311-1312.  Yamamoto T, Katoh H, Wakamatsu M, Kondo U. Anesthetic problems in patients with Forestier’s disease (Abstract). Masui 1992; 41 (6): 1008-1010.  Broadway JW. Forestier’s disease (ankylosing hyperostosis): a cause for difficult intubation. Anaesthesia 1994; 49 (10): 919-920.  Aziz ES, Thompson AR, Baer S. Difficult laryngeal mask insertion in a patient with Forestier’s disease. Anaesthesia 1995; 50 (4): 370.  Togashi H, Hirabayashi Y, Mitsuhata H, Saitoh K, Shimizu R. The beveled tracheal tube orifice abutted on the tracheal wall in a patient with Forestier’s disease. Anesthesiology 1993; 79 (6): 1452-1453.  Palmer JH, Ball DR. Awake tracheal intubation with the intubating laryngeal mask in a patient with diffuse idiopathic skeletal hyperostosis. Anaesthesia 2000; 55 (1): 70-74.  Tortosa JA, Hernandez-Palazon J. Forestier disease and interscalene brachial plexus block. Eur J Anaesthesiol 1998; 15 (6): 805-806.  Hortelano AM, Torres D, Gilsanz F. Spinal anesthesia in a man with diffuse skeletal hyperperostosis (Forestier and Rotés Querol disease]. Rev Esp Anestesiol Reanim. 2007 Jan;54(1):56-8.  Forestier syndrome and obstructive sleep apnea: Surgical treatment.  Ribeiro DK, Pinto JA, Freitas GS. Eur Ann Otorhinolaryngol Head Neck Dis. 2018 Jun;135(3):209-211. doi: 10.1016/j.anorl.2017.05.004.  Forestier-Rotés Querol disease: Cervical radiological progression and onset of dysphagia. García García M. Reumatol Clin. 2016 Sep-Oct;12(5):292-3. doi: 10.1016/j.reuma.2015.10.014.  Tan MS, Ma HN, Yi P, Yang F, Tang XS. [Surgical treatment for Forestier disease: a report of 8 cases]. (Abstract, artículo en chino). Zhongguo Gu Shang. 2015 Jan;28(1):78-81.  Suller Marti A, Gracia-Tello B, Velázquez A, Tejero C. Forestier-Rotés-Querol's disease. Rev Clin Esp. 2015 Apr;215(3):e23-4. doi: 10.1016/j.rce.2014.08.004. Epub 2014 Oct 31.  Quillo-Olvera J. [Forestier syndrome: case report and literature review]. Acta Ortop Mex. 2014 Jan-Feb;28(1):49-53.  Gómez-Torres A, Ceballo Pedraja JM, Abrante Jiménez A, Esteban Ortega F. [Treatment of two cases of Forestier-Rotes-Querol's disease]. Acta Otorrinolaringol Esp. 2014 Jan-Feb;65(1):56-8. doi:10.1016/j.otorri.2012.05.005.  Castañeda M, Batllori M, Yoldi FJ, Martín MP. [Difficult airway in a patient with Forestier-Rotés-Querol disease]. Rev Esp Anestesiol Reanim. 2013;60(4):242. doi: 10.1016/j.redar.2012.03.027.  Presutti L, Alicandri-Ciufelli M, Piccinini A, Trebbi M, Marchioni D, Ghidini A, Ruberto M. Forestier disease: single-center surgical experience and brief literature review. Ann Otol Rhinol Laryngol. 2010 Sep;119(9):602-8.  Caminos CB, Cenoz IZ, Louis CJ, Otano TB, Esáin BF, Pérez de Ciriza MT.  Am J Emerg Med. 2008 Nov;26(9):1072.e1-3. doi: 10.1016/j.ajem.2008.03.048. |
| --- |
